# Supplementary material
Source: MDPI journal article supplement (https://www.mdpi.com/2075-163X/10/6/551)
Supplement: s1 [file s1]

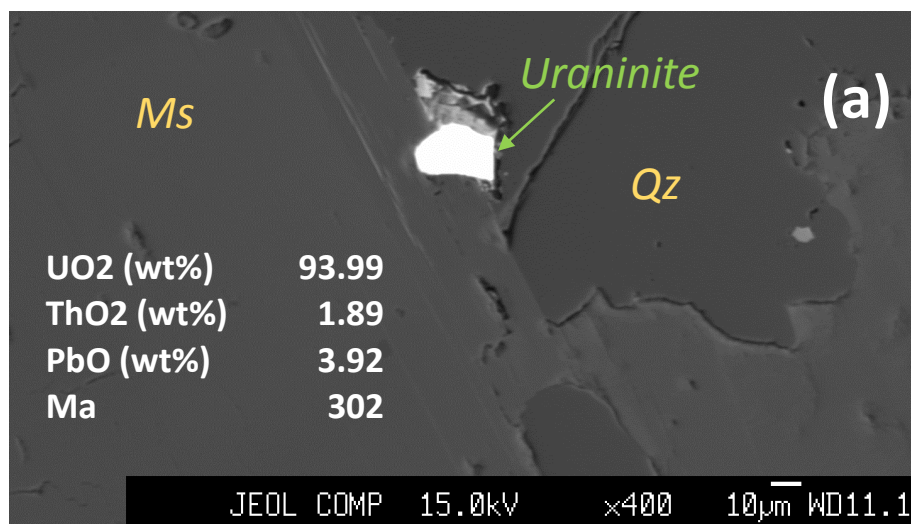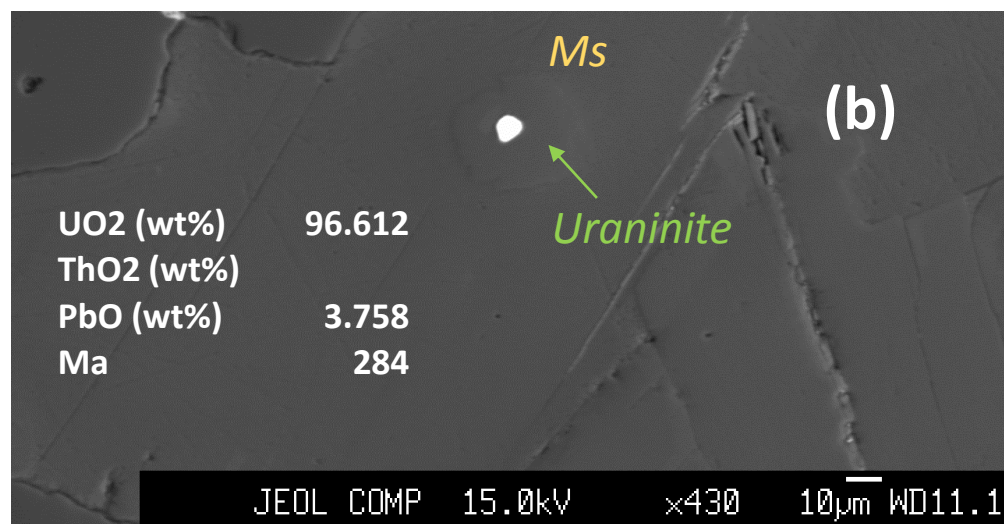

**Figure S5.** Examples of interstitial uraninite at the interface of primary quartz and secondary white mica **(a)** and uraninite inclusions in secondary coarse-grained white mica **(b)** along with the respective composition and age estimates.
