# Supplementary material
Source: MDPI journal article supplement (https://www.mdpi.com/2075-163X/10/6/551)
Supplement: s1 [file s1]

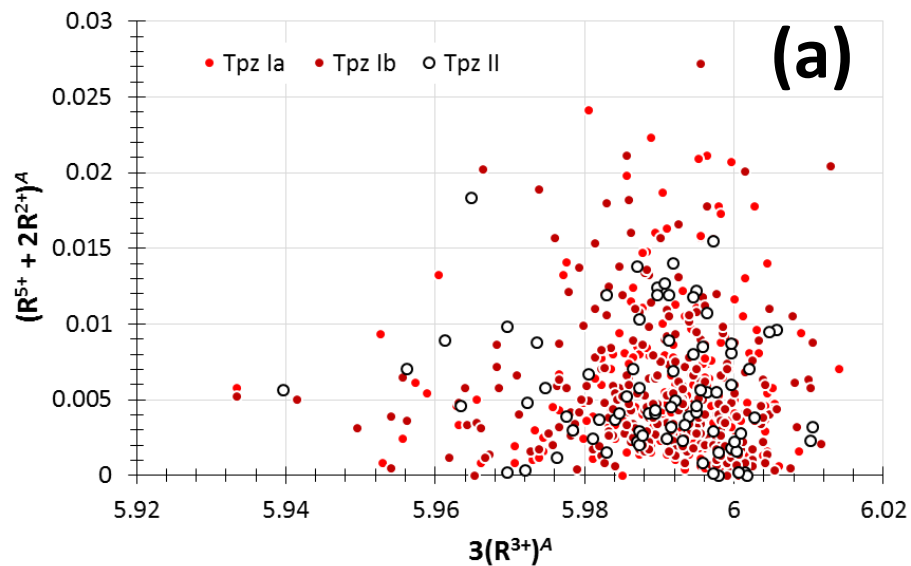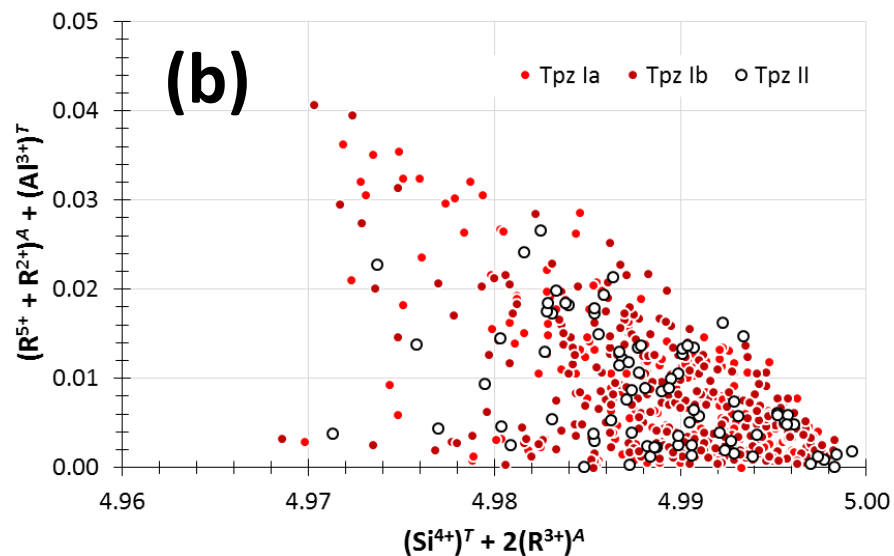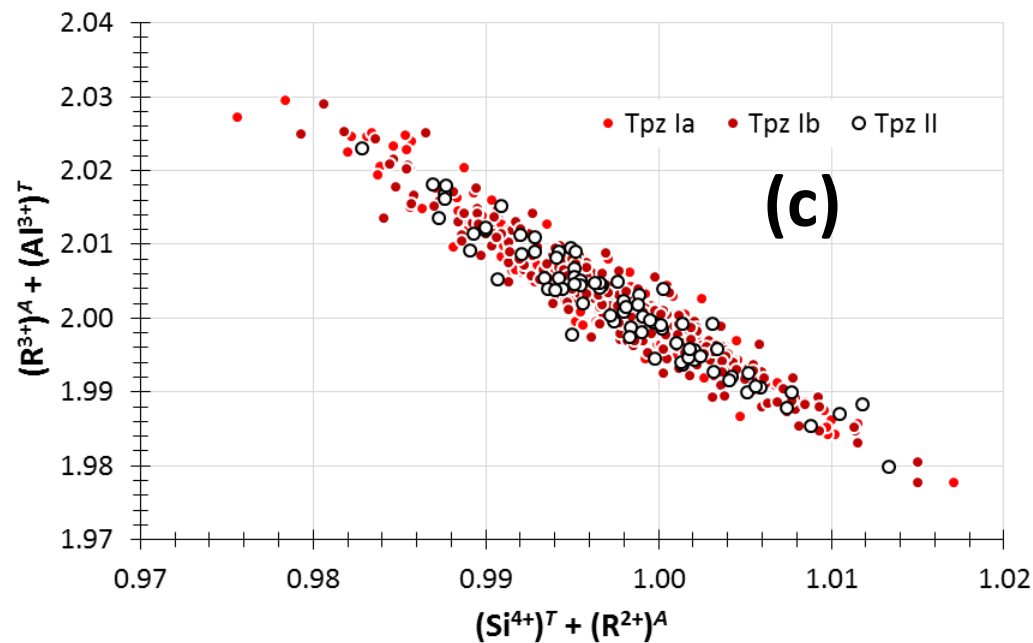

**Figure S1.** Compositional variation of the analysed topaz resulting of  $Al^{3+}$  substitution by  $R^{2+}$  or  $R^{5+}$ . In all plots, values account for atoms per formula unit.
