# Supplementary material
Source: MDPI journal article supplement (https://www.mdpi.com/2075-163X/10/6/551)
Supplement: s1 [file s1]

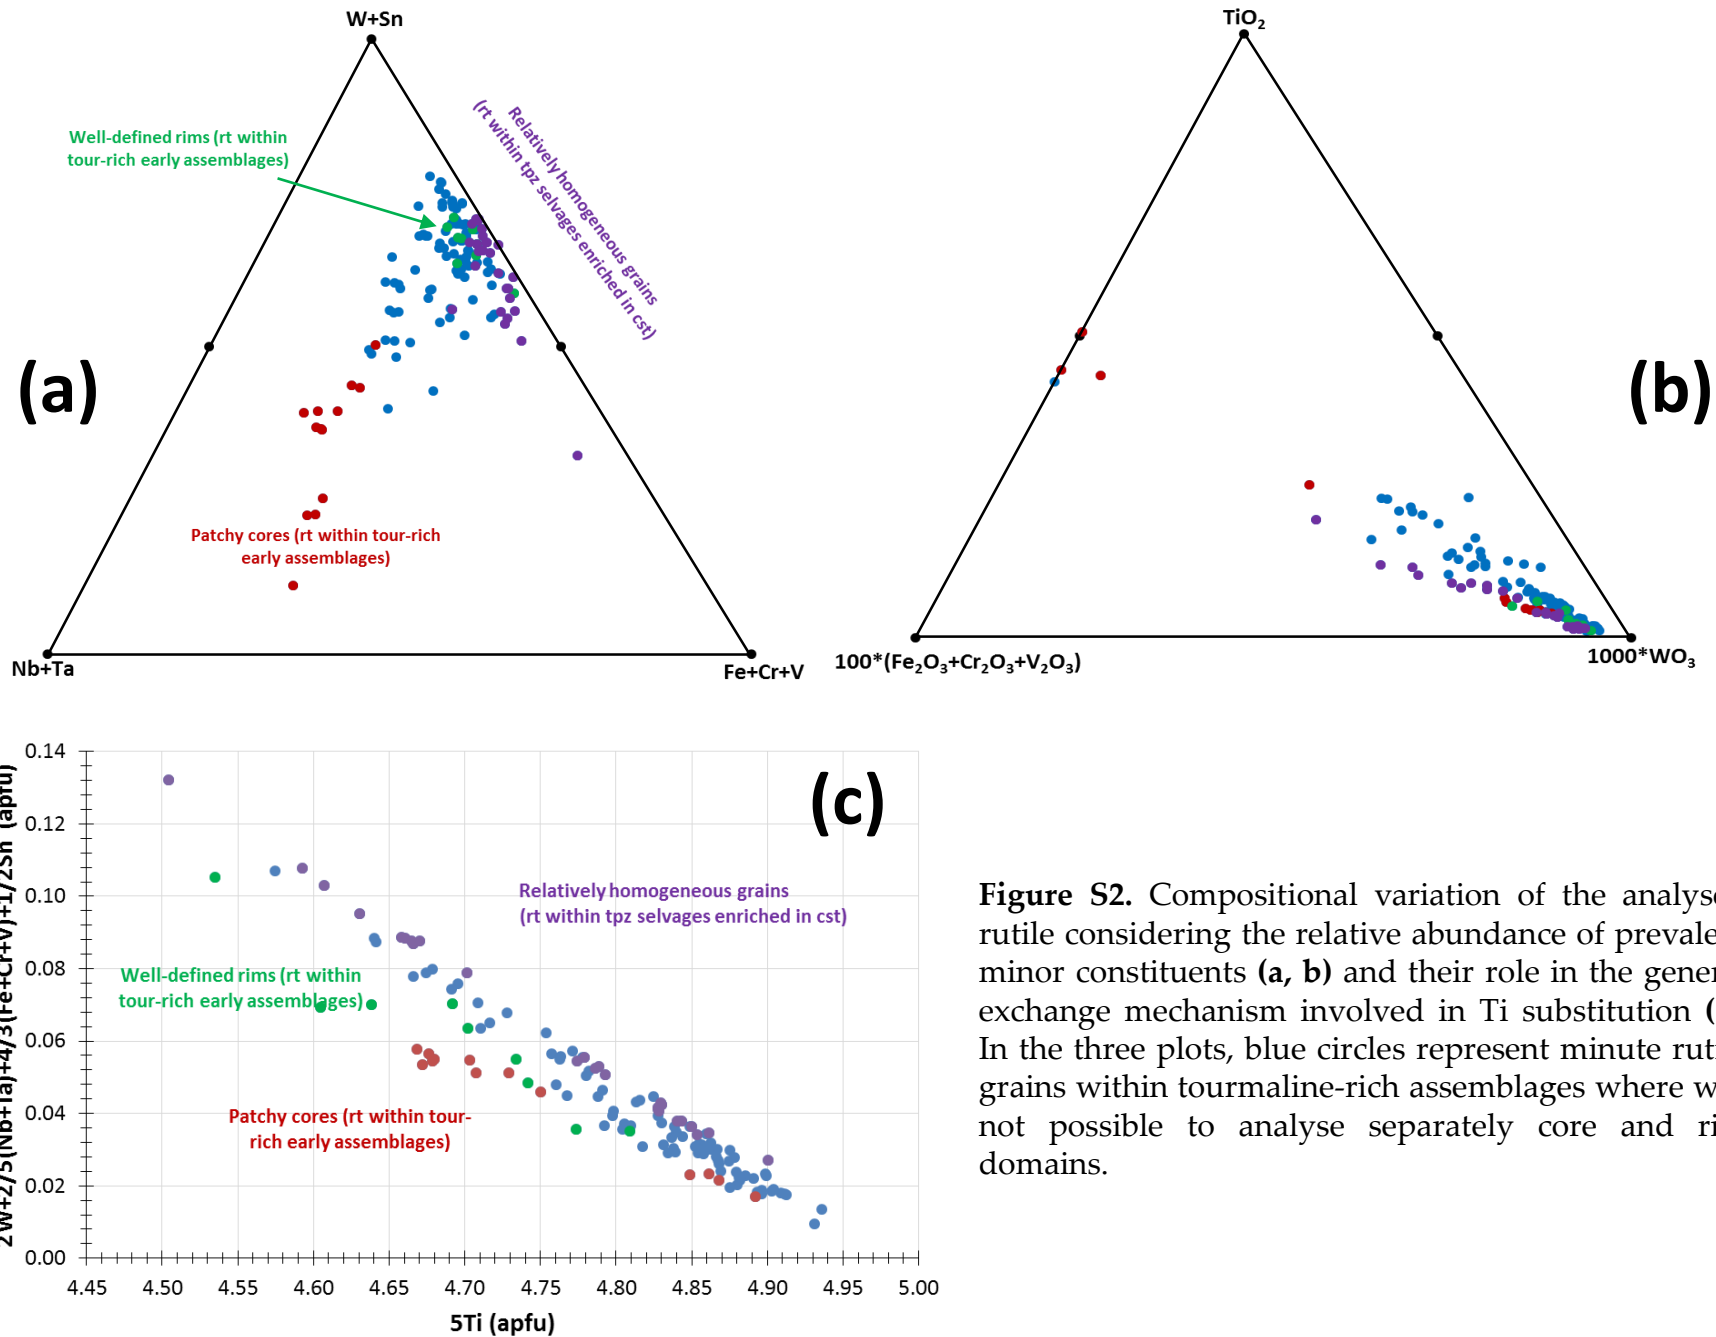

**Figure S2.** Compositional variation of the analysed rutile considering the relative abundance of prevalent minor constituents **(a, b)** and their role in the general exchange mechanism involved in Ti substitution **(c)**. In the three plots, blue circles represent minute rutile grains within tourmaline-rich assemblages where was not possible to analyse separately core and rim domains.
