# Supplementary material
Source: MDPI journal article supplement (https://www.mdpi.com/2075-163X/10/6/551)
Supplement: s1 [file s1]

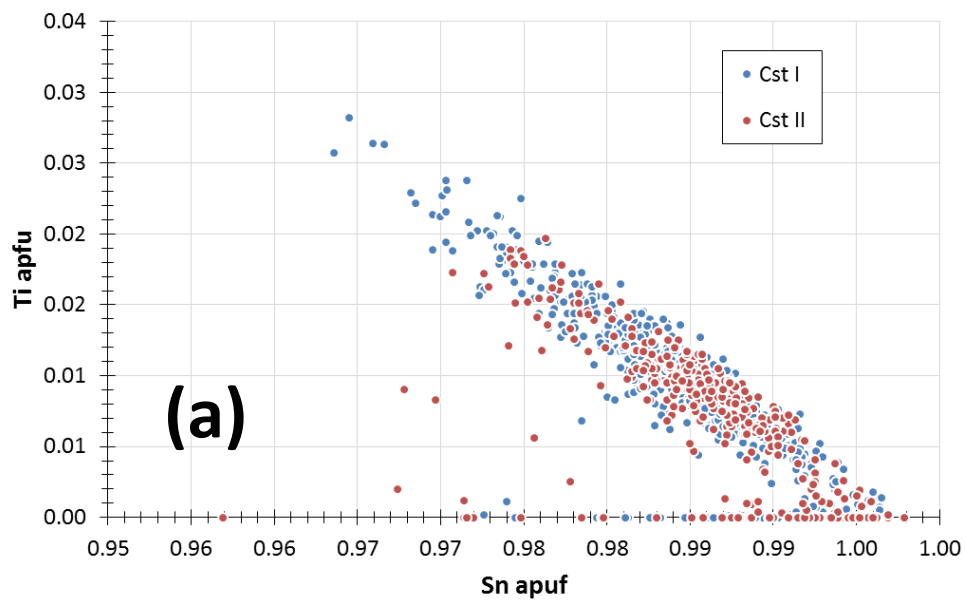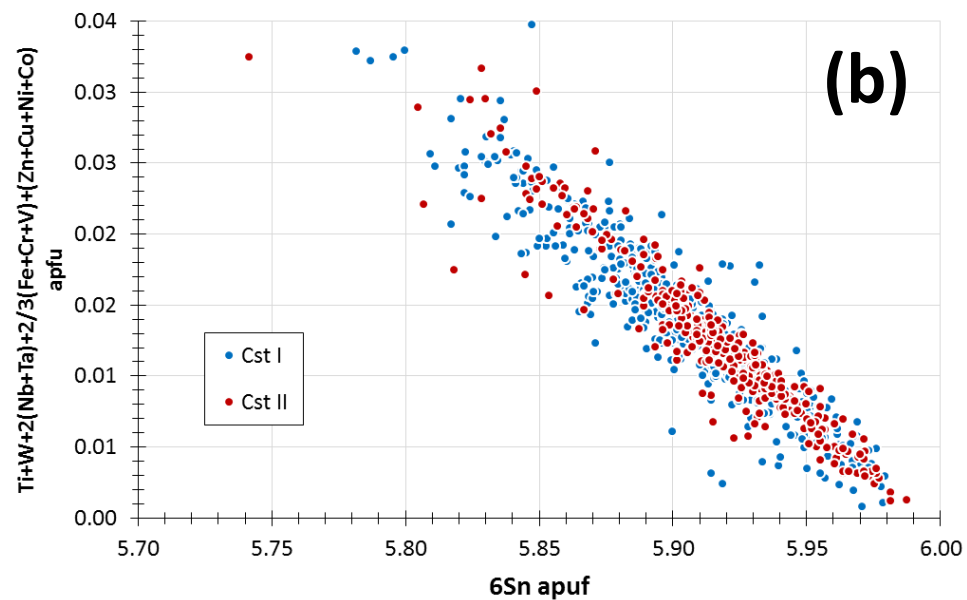

**Figure S3.** Cross-plots of atoms per formula unit (apfu) illustrating the substitution of Sn in cassiterite, mostly Ti (a) but along with various  $\text{R}^{2+}$ ,  $\text{R}^{3+}$ ,  $\text{R}^{5+}$  and  $\text{R}^{6+}$  ions (b).
