# Supplementary material
Source: MDPI journal article supplement (https://www.mdpi.com/2075-163X/10/6/551)
Supplement: s1 [file s1 › Tables S1-S10.xlsx]

## Sheet: Table S1
	Table S1: EPMA analytical profiles used for assess the compositional characteristics of silicates, phosphates and oxides
		Silicates								Phosphates			Oxides			Standards
		15 kV; 25 nA								15 kV; 4 nA	15 kV; 25 nA		15 kV; 25 nA			MINM25-53		METM25-44		REEP25-15
		Topaz		Mica		Tourmaline		Chlorite								a01	Albite	m01	Be	p01	YP5O14
		d.l. (ppm)	Stds	d.l. (ppm)	Stds	d.l. (ppm)	Stds	d.l. (ppm)	Stds	d.l. (ppm)	d.l. (ppm)	Stds	d.l. (ppm)	Stds		a02	Almandine	m02	BN	p02	LaP5O14
	Ag												370	o12,m26		a03	Anhydrite	m03	C	p03	CeP5O14
	Al	183	a28	167	a02,a07	98	a41	127	a15	310	137	a02	135	a35		a04	Apatite	m04	Mg	p04	PrP5O14
	As									911	428	a48,m18	443	a48,m18		a05	Barite	m05	Al	p05	NdP5O14
	Au												316	s16,m39		a06	Benitoite	m06	Si	p06	SmP5O14
	Ba	553	a05	424	a05			406	a06	1040	622	a06	657	a06		a07	Biotite	m07	Sc	p07	EuP5O14
	Bi												794	a50,m42		a08	Pollucite	m08	Ti	p08	GdP5O14
	Ca	210	a21	167	a21,a07	128	a21	138	a10	405	80	a21	238	a21		a09	Thalium Bromide	m09	V	p09	TbP5O14
	Ce	1856	a32,r03,p03							4246	1117	a32,r03,p03				a10	Bustamite	m10	Cr	p10	DyP5O14
	Cl			118	a45					319	104	a45				a11	Calcite	m11	Mn	p11	HoP5O14
	Co													a19		a12	Cassiterite	m12	Fe	p12	ErP5O14
	Cr	261	a17,a16	245	a17,a16	178	a17,a16	203	a17,a16				291	a17,a16		a13	Celestite	m13	Co	p13	TmP5O14
	Cs			460	a08			351	a08							a14	Cuprite	m14	Ni	p14	YbP5O14
	Cu												848	a14,m15		a15	Chlorite	m15	Cu	p15	LuP5O14
	Dy									5906	3005	o19,p10,r10				a16	Chromium Diopside	m16	Zn
	Er									1661	990	o19,p12,r12				a17	Chromium Oxide	m17	Ge	REEM25-15
	Eu									1171	733	o13,p07,r07				a18	Cinnabar	m18	GaAs	r01	Y
	F	1806	a23,a04	911	a23,a04	969	a04,a23	1018	a23,a04	3213	1023	a04,a23				a19	Skutterudite	m19	Se	r02	LaF3
	Fe	245	a25	270	a29	170	a02	202	a02	506	191	a02	294	a25,a26		a20	Crocoite	m20	Zr	r03	CeF3
	Ga	322	m18													a21	Diopside	m21	Nb	r04	PrF3
	Gd									2348	1195	o13,p08,r08				a22	Dolomite	m22	Mo	r05	NdF3
	Ge	289	m17													a23	Fluorite	m23	Ru	r06	Sm
	Hf									1918		m32				a24	Galena	m24	Rh	r07	EuF3
	Ho									3148	1669	o19,p11,r11				a25	Haematite	m25	Pd	r08	Gd
	K	91	a41	83	a41	109	a41	67	a41	167	126	a41	329	a41		a26	Magnetite	m26	Ag	r09	Tb
	La	606	a32,p02,r02							1055	364	a32,p02,r02				a27	Periclase	m27	Cd	r10	Dy
	Lu									3275	1783	o15,p15,r15				a28	Jadeite	m28	InP	r11	Ho
	Mg	150	a27	139	a15	99	a34	105	a15	284	91	a37	131	a27		a29	Kaersutite	m29	Sn	r12	Er
	Mn	361	a10	324	a10	225	a10	259	a10	663	259	a10	407	a39		a30	Pyrite	m30	Sb	r13	Tm
	Na	189	a28	132	a28	119	a28	111	a28	348	122	a28	141	a28		a31	Molybdenite	m31	Te	r14	Yb
	Nb	736	o24,m21			418	m21,o24			1598	491	o24,m21	414	m21,o24		a32	Monazite	m32	Hf	r15	LuF3
	Nd	1340	o16,p05,r05							2377	408	o16,p05,r05				a33	Obsidian	m33	Ta
	Ni			480	a52,a36			406	a52,a36				389	a52,a36		a34	Olivine	m34	W	Jeol standards
	P									531	127	a04,a32,p01-p15	488	a04,a32		a35	Plagioclase	m35	Re	s01	Cr
	Pa									1263	577					a36	Pentlandite	m36	Os	s02	Mg
	Pb									596	464	a24,a20	608	a24,a20		a37	Pyrope	m37	Ir	s03	Fe
	Pr	3948	a32,p04,r04							2838	1633	a32,p04,r04				a38	Quartz	m38	Pt	s04	Al
	Rb			579	na											a39	Rhodonite	m39	Au	s05	Ni
	S									681	248	a44,a05,a03	286	a44,a05,a03		a40	Rutile	m40	TlBrI	s06	Si
	Sc	123	m07													a41	Sanidine	m41	Pb	s07	Cu
	Si	181	a10	312	a34,a07	103	a21	118	a37,a07	355	169	a21	180	a21		a42	Sphalerite	m42	Bi	s08	Ti
	Sm	1651	o15,p06,r06							1180	722	o15,p06,r06				a43	Spodumene	m43	Th	s09	ZrO2
	Sn			761	a12,m29								533	a12,m29		a44	Stibnite	m44	U	s11	Mo
	Sr									492	644	a13				a45	Tugtupite			s12	Zr
	Ta	1538	o20			967	o20			2950	1639	o20	1814	o20		a46	Willemite			s13	W
	Tb									2871	1827	o13,p09,r09				a47	Zirconia	Internal standards		s14	Cd
	Th									860	446	a32				a48	Galium Arsenide	o11	V	s16	Au
	Ti	310	a40	273	a40	197	a40	223	a40	534	310	a06	329	a40		a49	Boron Nitride	o12	Ag
	Tm									3174	1678	o13,p13,r13				a50	Bismuth Selenide	o13	REE 1
	U									526	279	UO2,gla				a51	Yttrium Al Garnet	o14	REE 5
	V	251	o11,m09							541	360	o11,m09	272	o11,m09		a52	Nickel Silicide	o15	REE 2
	W					565	s13						1808	m34		a53	Antimonium Teluride	o16	REE 6
	Y	446	a51,a47							627	274	a47,a51,p01,r01						o17	REE 3
	Yb									2889	1650	o15,p14,r14				Other		o19	REE 4
	Zn	819	a46	876		328	a46	619	a42				974	a46		gla	U3O8	o20	LiTa03
	Zr	298	a47							744	363	a47	382	a47		UO2	UO2	o24	LiNbO3
	empty cell= not measured

## Sheet: Table S2
	Table S2: Representative analyses, ion distributions per formula unit and range of concentrations (in wt%) of essential elements in tourmaline
		Tour Ia				Tour Ib				Tour Ic				Tour II
		ap6_l1_5/4	ms2_b2/7	p5d/1	Range	ms17_b6/3	ms23_b6/9	tur7b_b1/1	Range	ms22_b7/7	ms22_b8/1	tpz9_b1/3	Range	tur8b_b1/7	tur7a_b1/1	tur9_b4/1	Range
	WO3	0.09	< d.l.	< d.l.	< d.l.	< d.l.	< d.l.	< d.l.	< d.l.	0.117	0.072	< d.l.	up to 0.118	< d.l.	< d.l.	< d.l.	< d.l.
	Ta2O5	< d.l.	< d.l.	< d.l.	< d.l.	< d.l.	< d.l.	< d.l.	< d.l.	0.084	< d.l.	< d.l.	< d.l.	< d.l.	< d.l.	< d.l.	< d.l.
	Nb2O5	< d.l.	< d.l.	< d.l.	< d.l.	< d.l.	< d.l.	< d.l.	< d.l.	0.07	< d.l.	< d.l.	up to 0.070	< d.l.	< d.l.	< d.l.	< d.l.
	TiO2	0.476	0.48	0.373	up 1.017	0.126	0.265	0.606	up 1.203	0.063	0.097	0.211	0.009 - 0.894	0.05	0.084	0.235	0.013 - 0.264
	SiO2	35.937	36.809	36.207	35.460 - 37.508	36.843	36.149	36.638	35.026 - 37.671	36.074	36.7	36.604	36.074 - 37.714	36.961	37.51	37.216	35.779 - 37.510
	Fe2O3 *	3.4786	2.7324	2.0044	up to 9.748	4.2872	3.8653	5.4792	up to 0.809	3.5203	4.5576	4.6002	2.104 - 9.528	3.3407	7.7163	6.503	up to 8.250
	Cr2O3	0.116	0.065	0.073	up to 0.378	0.028	0.084	0.083	up to 0.557	0.059	0.054	0.085	0.002 - 0.138	0.042	0.065	0.053	0.018 - 0.107
	Al2O3	31.168	32.829	31.946	28.544 - 35.037	33.786	32.522	31.717	28.079 - 35.208	33.561	34.43	31.861	29.823 - 34.430	30.718	33.052	32.668	29.948 - 33.266
	B2O3 **	10.4632	10.6976	10.5154	10.308 - 10.919	10.7004	10.4908	10.6572	10.305 - 10.916	10.4983	10.6567	10.6194	10.499 - 10.946	10.7104	10.8884	10.7996	10.530 - 10.888
	ZnO	0.068	0.055	0.084	up to 0.205	0.047	0.107	0.068	up to 0.201	0.113	0.121	0.138	0.007 - 0.167	0.048	0.091	0.135	0.033 - 0.135
	FeO	6.309	4.0904	7.1234	0.266 - 10.216	4.0043	8.2119	2.8257	up to 10.680	8.3274	7.639	5.0337	1.515 - 8.349	2.3851	0.1998	1.9465	0.200 - 5.790
	MnO	0.038	0.014	0.037	up tp 0.158	0.013	0.029	0.017	up to 0.181	0.094	0.048	0.071	up to 0.129	0.023	0.061	0.028	0.023 - 0.061
	CaO	0.283	0.227	0.069	up to 1.02	0.105	0.045	0.385	up to 1.204	0.042	0.021	0.264	up to 0.528	0.78	0.149	0.137	0.137 - 0.780
	MgO	4.484	5.753	4.84	0.693 - 6.336	3.902	2.15	4.742	0.746 - 7.772	1.63	0.837	4.386	0.837 - 5.757	8.525	4.848	4.823	4.823 - 8.525
	K2O	0.045	< d.l.	< d.l.	up tp 0.752	< d.l.	0.038	0.038	up to 0.208	0.041	0.032	0.018	up to 0.076	0.012	< d.l.	< d.l.	up to 0.024
	Na2O	2.163	1.927	2.308	1.088 - 2.713	1.456	1.708	1.979	1.314 - 2.698	1.298	1.078	1.98	0.976 - 2.438	2.366	1.405	1.555	1.405 - 2.703
	Li2O *	0.5808	0.5432	0.4196	0.123 - 1.197	0.7545	0.6571	0.9107	0.250 - 1.180	0.6235	0.8186	0.7064	0.428 - 1.052	0.4759	0.993	0.8373	0.322 - 0.993
	F	0.54	0.14	0.762	up to 1.001	0.144	0.427	0.143	up to 1.089	0.281	0.222	0.611	up to 0.974	0.877	< d.l.	0.195	up to 1.119
	H2O *	3.354	3.6245	3.2668		3.6236	3.4171	3.6092		3.4889	3.5715	3.3742		3.2795	3.7562	3.6336
	Total#	99.6285	99.992	100.038		99.927	100.166	99.898		99.9853	100.996	100.568		100.594	100.927	100.783
	O=F	-0.2274	-0.059	-0.3209		-0.0606	-0.1798	-0.0602		-0.1183	-0.0935	-0.2573		-0.3693	-0.0004	-0.0821
	Total	99.4011	99.9331	99.7168		99.8664	99.9865	99.8378		99.867	100.903	100.311		100.224	100.926	100.701
	Si	5.9696	5.9804	5.9845		5.9844	5.989	5.9752		5.9723	5.9856	5.9909		5.998	5.9876	5.9895
	Al	0.0304	0.0196	0.0155		0.0156	0.011	0.0248		0.0277	0.0144	0.0091		0.002	0.0124	0.0105
	Total	6	6	6		6	6	6		6	6	6		6	6	6
	B **	3	3	3		3	3	3		3	3	3		3	3	3
	W	0.0039	0	0		0.0013	0	0		0.005	0.003	0.0002		0	0.0015	0.0001
	Ta	0.0014	0	0		0	0	0		0.0038	0.0007	0		0	0.0017	0.0005
	Nb	0.0003	0	0		0.0047	0	0		0.0052	0.0019	0		0	0.0019	0
	Ti	0.0595	0.0587	0.0464		0.0154	0.033	0.0744		0.0078	0.0119	0.026		0.0061	0.0101	0.0285
	Fe3+ *	0	0	0		0	0	0		0	0	0		0.1155	0	0
	Cr	0.0152	0.0083	0.0095		0.0036	0.011	0.0107		0.0077	0.007	0.011		0.0054	0.0082	0.0067
	Al	5.9197	5.933	5.9441		5.975	5.956	5.9149		5.9704	5.9755	5.9628		5.873	5.9766	5.9642
	Total	6	6	6		6	6	6		6	6	6		6	6	6
	Fe3+ *	0.4348	0.3341	0.2493		0.524	0.4819	0.6724		0.4386	0.5594	0.5666		0.2924	0.9269	0.7876
	Al	0.1518	0.3337	0.2636		0.4773	0.3833	0.1566		0.5504	0.6283	0.1739		0	0.2291	0.2216
	Zn	0.0083	0.0066	0.0103		0.0056	0.0131	0.0082		0.0138	0.0146	0.0167		0.0058	0.0107	0.016
	Fe2+	0.8765	0.5558	0.9847		0.544	1.1378	0.3854		1.153	1.042	0.689		0.3237	0.0267	0.262
	Mn	0.0053	0.0019	0.0052		0.0018	0.0041	0.0023		0.0132	0.0066	0.0098		0.0032	0.0082	0.0038
	Mg	1.1104	1.3934	1.1926		0.9449	0.531	1.1529		0.4023	0.2035	1.0701		2.0624	1.1536	1.1571
	Li *	0.388	0.3549	0.2789		0.4929	0.4378	0.5973		0.4151	0.5369	0.465		0.3106	0.6374	0.5419
	Total	2.9752	2.9804	2.9845		2.9904	2.989	2.9752		2.9864	2.9913	2.9911		2.998	2.9927	2.9901
	Ca	0.0504	0.0395	0.0122		0.0183	0.008	0.0673		0.0075	0.0037	0.0463		0.1356	0.0255	0.0236
	K	0.0095	0	0		0	0.008	0.0079		0.0087	0.0067	0.0038		0	0	0.0008
	Na	0.6966	0.607	0.7396		0.4585	0.5486	0.6258		0.4166	0.3409	0.6283		0.7444	0.4348	0.4852
	Total	0.7565	0.647	0.752		0.477	0.5647	0.701		0.4328	0.3512	0.6784		0.88	0.4611	0.5097
	OH *	3.7163	3.9281	3.6017		3.926	3.7763	3.9262		3.8529	3.8855	3.6837		3.5499	3.9995	3.9007
	F	0.2837	0.0719	0.3983		0.074	0.2237	0.0738		0.1471	0.1145	0.3163		0.4501	0	0.0993
	Total	4	4	4		4	4	4		4	4	4		4	4	4
	* algebraic estimation; ** assumed to be 3 B atoms per formula unit

## Sheet: Table S3
	Table S3: Representative analyses, ion distributions per formula unit and range of concentrations (in wt%) of essential elements in mica
		Ms Ia										Ms Ib						Ms Ic		Ms II				Ms III
		Subgroup 1		Subgroup 2		Subgroup 3		Subgroup 4		Subgroup 5		Subgroup 1		Subgroup 2		Subgroup 3				Subgroup 1		Subgroup 2
		w27_b7/2	Range	ms30_b6/6	Range	tur3b_b3/4	Range	ms21_ger/5	Range	cst1_b3/5	Range	ms23_b1/1	Range	cst9_b1/3	Range	p12a/3	Range	tur7a_b2/4	Range	PO16_2/2	Range	tpz1_b1/4	Range	cst2_b4/5	Range
	SnO2	0.256	up to 0.899	0.149	up to 0.947	< d.l.	up to 0.722	< d.l.	up to 0.495	< d.l.	< d.l.	< d.l.	< d.l.	< d.l.	up to 0.181	< d.l.	< d.l.	< d.l.	< d.l.	< d.l.	< d.l.	< d.l.	< d.l.	< d.l.	< d.l.
	TiO2	< d.l.	up to 0.626	0.253	up to 0.590	0.123	up to 0.363	0.179	up to 0.523	< d.l.	up to 0.301	0.413	up to 0.518	0.078	up to 0.092	< d.l.	up to 0.099	0.266	0.016 - 0.426	0.047	up to 0.379	< d.l.	upt to 0.278	< d.l.	< d.l.
	SiO2	49.21	45.944 - 46.003	47.206	45.701 - 50.081	47.196	44.610 - 55.991	47.306	45.758 - 50.061	54.189	47.662 - 57.617	47.821	45.850 - 53.145	48.508	36.098 - 51.800	45.688	45.015 - 49.115	47.986	46.607 - 50.204	49.068	46.026 - 52.165	47.561	45.533 - 50.134	53.718	47.931 - 57.507
	Fe2O3 *	< d.l.	up to 4.182	2.2587	up to 8.384							0	up to 7.878					0	up to 3.676
	Cr2O3	0.055	up to 0.215	0.078	up to 0.203	0.092	up to 0.125	0.049	0.116	0.071	0.016 - 0.084	0.042	up to 0.151	0.05	up to 0.097	0.061	up to 0.102	0.055	0.007 - 0.180	0.084	up to 0.138	0.059	0.013 - 0.089	0.058	0.001 - 0.092
	Al2O3	28.515	21.000 - 32.407	31.095	23.731 - 33.551	23.323	19.512 - 33.303	31.434	24.933 - 33.208	25.016	22.882 - 33.558	30.507	20.734 - 35.548	23.927	19.530 - 32.978	32.076	25.953 - 33.225	30.425	22.845 - 33.050	29.306	22.354 - 34.736	33.397	20.359 - 33.397	24.187	22.028 - 33.172
	BaO	0.058	up to 0.263	0.068	up to 0.357	< d.l.	up to 0.272	0.06	up to 0.394	< d.l.	up to 0.248	0.074	up to 0.181	0.069	up to 0.097	0.06	up to 0.261	0.289	0.031 - 0.429	0.055	up to 0.288	< d.l.	up to 0.245	< d.l.	up to 0.073
	ZnO	< d.l.	up to 0.893	< d.l.	< d.l.	< d.l.	up to 0.372	< d.l.	< d.l.	< d.l.	< d.l.	< d.l.	up to 0.790	< d.l.	< d.l.	0.124	up to 0.124	< d.l.	up tp 0.152	< d.l.	< d.l.	< d.l.	< d.l.	< d.l.	< d.l.
	FeO	3.956	up to 11.598	0.9516	up to 10.190	6.297	1.688 - 11.470	2.996	1.681 - 8.093	2.34	0.953 - 6.100	2.586	up to 10.63	8.421	2.359 - 18.835	4.07	1.777 - 7.837	2.859	up to 9.296	3.4952	up to 3.908	2.577	2.272 - 11.490	3.734	0.758 - 5.274
	MnO	0.062	up to 0.269	0.089	up to 0.207	0.149	up to 0.593	0.065	up to 0.146	0.034	up to 0.085	0.036	up to 0.214	0.062	up to 0.251	0.082	0.007 - 0.221	0.071	up to 0.128	0.044	up to 0.136	0.067	up to 0.177	0.031	up to 0.064
	CaO	0.07	upt to 0.363	< d.l.	up to 0.078	0.049	up to 0.225	< d.l.	up to 0.157	0.335	0.021 - 0.585	0.022	up to 0.172	0.042	up to 0.073	0.036	up to 0.036	0.037	up to 0.157	< d.l.	up to 0.193	< d.l.	up to 0.176	0.115	0.015 - 0.644
	MgO	1.178	0.040 - 4.523	1.038	0.163 - 3.807	2.944	0.353 - 3.382	0.571	0.265 - 2.768	3.322	0.477 - 0.388	1.622	0.003 -3.929	1.58	0.132 - 11.288	0.025	0.025 - 2.145	1.169	0.157 - 3.509	1.225	0.191 - 3.881	0.02	0.020 - 2.910	2.704	0.533 - 3.927
	Cs2O	< d.l.	up to 0.073	< d.l.	up to 0.049	< d.l.	up to 0.082	< d.l.	up to 0.043	< d.l.	up to 0.079	< d.l.	up to 0.067	< d.l.	up to 0.100	< d.l.	up to 0.080	< d.l.	up to 0.066	0.067	up to 0.071	< d.l.	< d.l.	< d.l.	up to 0.072
	Rb2O	< d.l.	up to 0.095	< d.l.	< d.l.	< d.l.	up to 0.100	< d.l.	< d.l.	< d.l.	up to 0.142	< d.l.	up to 0.093	< d.l.	up to 0.111	< d.l.	< d.l.	< d.l.	< d.l.	< d.l.	< d.l.	< d.l.	< d.l.	< d.l.	< d.l.
	K2O	10.852	9.425 - 11.393	11.015	10.604 - 11.505	10.347	9.926 - 11.294	11.065	10.618 - 11.471	9.413	7.441 - 10.045	10.851	9.664 - 11.407	10.543	9.557 - 11.018	10.702	10.297 - 11.399	10.779	9.730 - 11.329	11.321	9.662 - 11.379	11.02	10.188 - 11.368	9.247	7.189 - 10.233
	Na2O	0.165	up to 9.98	0.346	0.048 - 0.717	0.116	0.01 - 0.694	0.424	0.082 - 0.801	0.03	up to 0.415	0.421	0.014 - 0.889	0.044	0.011 - 0.568	0.478	0.071 - 0.791	0.281	0.034 - 0.951	0.15	0.016 - 0.908	0.555	0.049 - 0.569	0.025	up to 0.262
	Li2O *					3.2037	2.915 - 4.105	1.5726	0.389 - 3.184					3.3501	up to 3.906	0.928	0.512 - 4.281					1.3963	0.554 - 3.831
	Cl	< d.l.	up to 0.037	< d.l.	up to 0.038	0.054	up to 0.055	< d.l.	< d.l.	0.01	up to 0.012	< d.l.	< d.l.	< d.l.	up to 0.08	0.014	up to 0.016	< d.l.	< d.l.	< d.l.	< d.l.	< d.l.	< d.l.	< d.l.	< d.l.
	F	1.956	0.449 - 4.412	1.46	0.310 - 3.309	2.413	0.417 - 4.903	1.575	0.270 - 2.970	1.098	0.627 - 2.217	1.703	0.352 - 4.632	3.495	0.125 - 5.608	1.178	up tp 2.191	1.636	0.461 - 3.200	1.369	0.918 - 4.500	1.087	0.940 - 4.900	1.915	0.618 - 3.194
	H2O *	3.4719		3.7313		3.1738		3.7392		4.0032		3.6144		2.7713		3.828		3.6316		3.7867		4.0329		3.5492
	Total#	99.8049		99.7586		99.5045		101.057		99.9462		99.7684		102.966		99.462		99.5086		100.425		101.839		99.6392
	O=F	-0.8236		-0.6148		-1.016		-0.6632		-0.4623		-0.7171		-1.4716		-0.496		-0.6889		-0.5764		-0.4577		-0.8064
	O=Cl	0		-0.0014		-0.0122		0		-0.0023		-0.0014		-0.0014		-0.0032		-0.0007		0		-0.0007		0
	Total	98.9813		99.1424		98.4762		100.394		99.4817		99.0499		101.493		98.9628		98.8191		99.8487		101.381		98.8329
	Si	3.3539		3.1986		3.2669		3.1618		3.5896		3.2415		3.2832		3.1204		3.264		3.3167		3.1348		3.6136
	Al	0.646		0.8014		0.7331		0.8382		0.4104		0.7585		0.7168		0.8796		0.736		0.6833		0.8652		0.3864
	Total	4		4		4		4		4		4		4		4		4		4		4		4
	Sn	0.007		0.004		0		0				0.0014		0		0		0		0		0
	Ti	0		0.0129		0.0064		0.009		0		0.0211		0.004		0		0.0136		0.0024		0.0001		0
	Fe3+ *	0		0.1152		0						0		0		0.0033		0		0.019
	Cr	0.003		0.0042		0.005		0.0026		0.0037		0.0023		0.0027				0.003		0.0045		0.0031		0.0031
	Al	1.6444		1.6818		1.1697		1.638		1.5426		1.6787		1.1918		1.7023		1.703		1.6514		1.7292		1.5312
	Zn	0		0		0		0		0		0		0				0		0		0		0
	Fe2+	0.2255		0.0539		0.3645		0.1675		0.1296		0.1466		0.4767		0.2325		0.1626		0.1976		0.1421		0.2101
	Mn	0.0036		0.0051		0.0087		0.0037		0.0019		0.0021		0.0036		0.0047		0.0041		0.0025		0.0037		0.0018
	Mg	0.1197		0.1049		0.3038		0.0569		0.328		0.1639		0.1594		0.0025		0.1185		0.1234		0.002		0.2712
	Li *					0.8918		0.4227						0.9119		0.2549						0.3701
	Total	2.0031		1.982		2.75		2.3003		2.0069		2.0159		2.75		2.2088		2.0048		2.0008		2.2502		2.0173
	Ba	0.0015		0.0018		0.0004		0.0016		0		0.002		0.0018		0.0016		0.0077		0.0015		0		0.0004
	Ca	0.0051		0		0.0036		0		0.0238		0.0016		0.003		0.0026		0.0027		0		0.001		0.0083
	Cs	0		0		0		0		0		0		0.0003		0		0		0.0019		0		0.0004
	Rb	0		0		0		0		0		0		0		0		0		0		0		0.003
	K	0.9436		0.9522		0.9137		0.9435		0.7955		0.9383		0.9103		0.9325		0.9353		0.9762		0.9266		0.7936
	Na	0.0218		0.0455		0.0156		0.0549		0.0039		0.0553		0.0058		0.0633		0.0371		0.0197		0.0709		0.0033
	Total	0.972		1		0.9333		1		0.8239		0.9972		0.9213		1		0.9828		1		0.999		0.8089
	OH *	1.5784		1.6864		1.4654		1.6671		1.7689		1.6342		1.2512		1.7439		1.6477		1.7073		1.7731		1.5926
	Cl	0		0.0007		0.0063		0		0.0011		0.0007		0.0007		0.0016		0.0003		0		0.0003		0
	F	0.4216		0.3129		0.5282		0.3329		0.23		0.3651		0.7481		0.2544		0.3519		0.2927		0.2266		0.4074
	Total	2		2		2		2		2		2		2		2		2		2		2		2
	* algebraic estimation

## Sheet: Table S4
	Table S4: Representative analyses, ion distributions per formula unit and range of concentrations (in wt%) of essential elements in topaz
		Tpz Ia				Tpz Ib				Tpz II
		APY3_6/2	tpz11_b5/2	cst1_b8/2	Range	tpz10_b1/3	tpz11_b1/2	tpz14_b4/1	Range	tpz4_b2/3	tpz8_b1/5	PO6_2/2	Range
	Ta2O5	< d.l.	< d.l	< d.l	up to 0.637	<d.l	<d.l	< d.l	up to 0.489	< d.l.	< d.l	0.418	up to 0.471
	Nb2O5	< d.l.	< d.l.	< d.l.	up to 0.160	< d.l	< d.l	< d.l	up to 0.161	< d.l.	< d.l.	< d.l.	up to 0.133
	ZrO2	< d.l.	0.038	< d.l.	up to 0.093	0.038	< d.l.	< d.l.	up to 0.083	0.043	< d.l.	< d.l.	up to 0.058
	GeO2	< d.l	< d.l.	< d.l.	up to 0.077	<d.l	< d.l	< d.l	up to 0.089	< d.l.	< d.l.	< d.l	up to 0.077
	TiO2	< d.l	< d.l	< d.l	up to 0.082	<d.l	0.04	< d.l.	up to 0.075	<d.l	< d.l	0.043	up to 0.053
	SiO2	32.217	32.416	32.354	31.355 - 32.954	32.139	32.249	32.47	30.455 - 33.123	32.353	32.477	31.914	31.463 - 32.926
	Sm2O3	0.208	< d.l	< d.l.	up to 0.312	<d.l	< d.l	< d.l.	up to 0.397	<d.l	< d.l.	< d.l	up to 0.219
	Nd2O3	< d.l	< d.l	< d.l	up to 0.295	< d.l	< d.l	< d.l	up to 0.336	< d.l	< d.l	< d.l	up to 0.282
	Pr2O3	< d.l	< d.l	0.446	up to 0.809	0.562	0.56	< d.l	up to 0.853	0.714	< d.l	< d.l	up to 0.714
	Ce2O3	< d.l	< d.l	0.213	up to 0.360	0.258	< d.l	< d.l	up to 0.444	<d.l	< d.l	0.258	up to 0.344
	La2O3	< d.l	< d.l	< d.l	up to 0.161	< d.l	< d.l	< d.l	up to 0.161	<d.l	<d.l	< d.l	up to 0.169
	Ga2O3	< d.l	< d.l	0.055	up to 0.074	< d.l	< d.l	0.025	up to 0.086	0.068	0.033	0.032	up to 0.090
	Fe2O3 *	0.0689	0.0378	0.0244	up to 0.268	0.02	0.0456	< d.l	up to 2.556	0.0633	0.0422	< d.l	up to 1.434
	Mn2O3 *	0.0523	< d.l	< d.l	up to 0.120	< d.l	< d.l	< d.l	up to 0.170	<d.l	< d.l	< d.l	up to 0.120
	Cr2O3	< d.l	< d.l	< d.l	up to 0.064	< d.l	< d.l	< d.l	up to 0.056	< d.l	0.039	< d.l	up to 0.044
	V2O3	< d.l	< d.l	< d.l	up to 0.065	< d.l	< d.l	< d.l	up to 0.067	<d.l	0.038	< d.l	up to 0.056
	Sc2O3	< d.l	< d.l	< d.l	up to 0.037	<d.l	< d.l	< d.l	up to 0.032	< d.l	< d.l	< d.l	up to 0.028
	Al2O3	55.04	54.815	54.987	54.055 - 56.275	54.862	54.991	55.085	53.029 - 56.055	54.597	54.926	55.128	53.744 - 55.958
	BaO	0.07	< d.l	< d.l	up to 0.132	<d.l	0.063	< d.l	up to 0.155	<d.l	< d.l	< d.l	up to 0.100
	ZnO	< d.l	0.061	0.101	up to 0.204	<d.l	< d.l	< d.l	up to 0.246	<d.l	< d.l	0.105	up to 0.209
	MgO	0.025	< d.l	0.037	up to 0.207	<d.l	0.084	0.033	up to 0.271	<d.l	< d.l	0.025	up to 0.175
	K2O	< d.l	< d.l	< d.l	up to 0.027	<d.l	< d.l	< d.l	up to 0.052	< d.l	< d.l	< d.l	up to 0.022
	Na2O	< d.l	0.025	< d.l	up to 0.078	<d.l	< d.l	< d.l	up to 0.047	< d.l	< d.l	< d.l	up to 0.046
	F	12.58	12.644	12.822	11.058 - 15.380	12.364	12.653	11.628	11.178 - 15.800	13.171	14.461	12.096	11.474 - 14.793
	H2O *	3.7631	3.7384	3.6755		3.8483	3.7425	4.2404		3.4719	2.8803	3.9789
	Total#	104.234	104.375	105		104.28	104.689	103.938		104.766	105.127	104.109
	O=F	-5.2971	-5.324	-5.399		-5.2061	-5.3278	-4.8962		-5.5459	-6.0891	-5.0933
	Total	98.9372	99.0512	99.601		99.0739	99.3612	99.0421		99.2203	99.0384	99.0156
	Ge	0	0	0.0003		0	0	0		0.0001	0.0003	0
	Si	0.993	0.9986	0.9945		0.9924	0.9926	0.9982		0.9983	1.0001	0.9851
	Al	0.007	0.0009	0.0053		0.0076	0.0074	0.0018		0.0016	0	0.0149
	Total	1	1	1		1	1	1		1	1.0004	1
	Ta	0.0006	0	0		0	0	0		0.0009	0	0.0035
	Nb	0	0	0.0003		0	0	0		0	0.0001	0.0004
	Zr	0.0002	0.0006	0.0001		0.0006	0.0001	0.0001		0.0006	0.0002	0
	Ti	0	0	0		0	0.0009	0		0	0	0.001
	Sm	0.0022	0	0.0002		0	0	0.0009		0	0.0009	0
	Nd	0.0005	0	0.0015		0.0004	0.0004	0		0.0002	0	0
	Pr	0	0.0017	0.005		0.0063	0.0063	0		0.008	0	0
	Ce	0	0	0.0024		0.0029	0	0		0	0.0005	0.0029
	La	0	0	0		0.0003	0	0		0	0	0.0001
	Ga	0.0001	0.0005	0.0011		0.0002	0	0.0005		0.0013	0.0007	0.0006
	Fe3+	0.0016	0.0009	0.0006		0.0005	0.0011	0		0.0015	0.001	0
	Mn	0.0012	0	0		0.0002	0	0		0	0	0
	Cr	0.0001	0.0002	0.0004		0	0	0		0	0.0009	0
	V	0	0.0002	0.0002		0.0004	0	0		0	0.0009	0.0002
	Sc	0	0	0		0	0	0		0.0003	0.0002	0
	Al	1.9925	1.9892	1.9867		1.9889	1.9874	1.9939		1.984	1.9935	1.9905
	Ba	0.0008	0.0001	0		0	0.0008	0		0	0	0.0004
	Zn	0	0.0014	0.0023		0	0	0		0	0	0.0024
	Mg	0.0011	0	0.0017		0	0.0039	0.0015		0	0	0.0012
	K	0.0002	0	0		0	0	0.0001		0.0003	0	0.0002
	Na	0	0.0015	0		0	0	0		0.0008	0	0
	Total	2.0011	1.9963	2.0025		2.0007	2.0009	1.997		1.9979	1.9989	2.0034
	OH *	0.7737	0.7682	0.7536		0.7926	0.7684	0.8695		0.7146	0.5916	0.8192
	F	1.2263	1.2318	1.2464		1.2074	1.2316	1.1305		1.2854	1.4084	1.1808
	Total	2	2	2		2	2	2		2	2	2
	* algebraic estimation

## Sheet: Table S5
		Table S5: Representative analyses, ion distributions per formula unit and range of concentrations (in wt%) of essential elements in chlorite
		Chl I						Chl II						Chl III
		Subgroup 1			Subgroup 2			Subgroup 1			Subgroup 2			Subgroup 1			Subgroup 2
		APY11_2/1	p1b/2	Range	p1c_chl/1	SP5_11/5	Range	cst13_b1/5	fl1_b5/3	Range	tpz11_b4/2	cst3_b1/4	Range	tpz10_b2/6	PO16_10/6	Range	tpz8_b2/2	tpz9_b9/5	Range
	TiO2	0	0.04	up to 0.181	0.025	0	up to 0.070	0.018	0	up to 0.040	0.006	0	up to 0.040	0	0.028	up to 0.059	0	0.017	up to 0.032
	SiO2	23.304	22.872	21.821 - 27.055	22.773	23.024	21.683 - 24.727	24.86	26.824	22.977 - 28.995	24.004	23.937	23.445 - 25.377	25.196	25.107	23.751 - 27.755	24.985	24.736	24.255 - 25.943
	Cr2O3	0.061	0.069	up to 0.118	0.074	0.053	up to 0.126	0.051	0.079	up to 0.112	0.104	0.058	up to 0.124	0.08	0.103	up to 0.125	0.075	0.098	up to 0.112
	Al2O3	21.13	21.03	17.359 - 24.433	20.626	20.501	17.452 - 21.905	21.971	23.171	17.759 - 25.648	19.764	20.029	18.340 - 23.526	20.713	20.54	17.931 - 25.013	18.445	20.387	17.451 - 21.175
	ZnO	< d.l	0.109	up to 0.171	< d.l	< d.l	up to 0.730	< d.l	< d.l	up to 0.249	< d.l	0.067	up to 0.254	< d.l	< d.l	up to 0.730	< d.l	0.078	up to 0.135
	NiO	0.05	< d.l	up to 0.079	< d.l	< d.l	up to 0.107	< d.l	0.037	up to 0.107	< d.l	< d.l	up to 0.064	< d.l	0.046	up to 0.075	< d.l	< d.l	up to 0.089
	FeO	42.857	44.266	31.191 - 45.276	44.426	44.338	38.934 - 46.760	38.278	33.987	23.670 - 43.666	44.777	43.895	33.149 - 45.990	38.069	40.284	26.315 - 43.873	43.996	42.748	42.147 - 45.339
	MnO	0.211	0.151	0.014 - 0.574	0.145	0.069	up to 0.234	0.095	0.069	up to 0.209	< d.l	0.149	up to 0.235	0.034	0.166	up to 0.319	0.132	0.156	0.039 -0.182
	MgO	1.508	0.943	0.970 - 10.603	1.052	1.052	0.023 - 4.314	3.143	4.464	0.857 - 15.656	0.184	0.644	0.127 - 5.779	4.579	2.781	0.736 - 13.979	0.788	0.963	0.331 - 0.982
	F	< d.l	0.094	up to 0.375	0.126	< d.l	up to 0.356	< d.l	< d.l	up to 0.404	0.112	0.225	up to 0.254	< d.l	0.102	up to 0.485	< d.l	0.194	up to 0.224
	H2O *	10.4827	10.3811		10.3083	10.3691		10.7483	11.1541		10.3058	10.2785		10.7806	10.6377		10.3486	10.4499
	Total#	99.6277	99.9571		99.6253	99.4301		99.2923	100.247		99.4218	99.3185		99.5126	99.8287		98.8286	99.8559
	O=F	0	-0.0396		-0.0531	-0.0021		-0.0038	0		-0.0472	-0.0947		0	-0.0429		0	-0.0817
	Total	99.6277	99.9175		99.5723	99.428		99.2885	100.247		99.3747	99.2238		99.5126	99.7857		98.8286	99.7742
	Si	2.6662	2.6311		2.6343	2.6624		2.7729	2.8842		2.7791	2.7644		2.803	2.8178		2.8956	2.8142
	Al	1.3338	1.3689		1.3657	1.3376		1.2271	1.1158		1.2209	1.2356		1.197	1.1822		1.1044	1.1858
	Total	4	4		4	4		4	4		4	4		4	4		4	4
	Ti	0	0.0035		0.0022	0		0.0015	0		0.0005	0		0	0.0024		0	0.0015
	Cr	0.0055	0.0063		0.0068	0.0048		0.0045	0.0067		0.0095	0.0053		0.007	0.0091		0.0069	0.0088
	Al	1.5154	1.4823		1.4463	1.4564		1.6611	1.8205		1.476	1.4905		1.5188	1.5348		1.415	1.5478
	Zn	0	0.0093		0.005	0		0	0		0	0.0057		0.0021	0		0.0028	0.0066
	Ni	0.0046	0		0	0		0.0013	0.0032		0.0031	0		0	0.0042		0	0.0017
	Fe	4.1007	4.2587		4.2978	4.2879		3.5706	3.0562		4.3356	4.2394		3.5419	3.7811		4.2642	4.0673
	Mn	0.0204	0.0147		0.0142	0.0068		0.009	0.0063		0.0018	0.0146		0.0032	0.0158		0.013	0.015
	Mg	0.2572	0.1617		0.1814	0.1814		0.5226	0.7155		0.0318	0.1109		0.7594	0.4653		0.1361	0.1633
	Total	5.9078	5.9367		5.9542	5.9381		5.7818	5.6678		5.8684	5.8701		5.8359	5.8168		5.8413	5.8139
	OH *	8	7.9658		7.9539	7.9982		7.9968	8		7.959	7.9178		8	7.9638		8	7.9302
	F	0	0.0342		0.0461	0.0018		0.0032	0		0.041	0.0822		0	0.0362		0	0.0698
	Total	8	8		8	8		8	8		8	8		8	8		8	8
	* algebraic estimation

## Sheet: Table S6
	Table S6: Representative analyses, ion distributions per formula unit and range of concentrations (in wt%) of essential elements in rutile
		Rutile in tourmaline-rich assemblages						Rutile in topaz selvages
		core	core	core	rim	rim	rim					Wole dataset
		p7b_rut1B/3	p7b_rut1D/5	p7b_rut1C/2	p5d_rut/4	p5e_rut/2	tur7b_b1/2	cst5_b5/1	cst20/1	p2e/2	p2e_rutC/1	Range
	WO3	1.112	1.537	0.013	1.407	1.289	4.077	0.467	2.02	4.349	2.043	up to 7.758
	Ta2O5	1.071	1.782	0.694	< d.l	< d.l	0.192	< d.l	0.127	< d.l	< d.l	up to 2.003
	Nb2O5	1.345	2.073	1.092	0.122	0.192	0.342	0.174	0.536	0.119	< d.l	up to 2.118
	SnO2	1.978	1.715	0.889	1.738	1.44	2.048	1.77	0.732	1.5629	1.8594	0.308 - 2.783
	ZrO2	< d.l	0.074	< d.l	0.035	< d.l	< d.l	0.091	< d.l	< d.l	0.066	up to 0.268
	TiO2	91.833	89.814	95.556	92.324	93.603	90.938	94.928	95.036	90.934	93.693	84.711 - 98.677
	Fe2O3	1.6981	1.9226	0.9302	1.7504	0.3812	2.2216	0.1834	0.6935	1.617	0.2701	0.060 - 3.462
	Cr2O3	< d.l	< d.l	< d.l	0.469	0.943	< d.l	0.081	0.123	< d.l	0.064	up to 1.021
	V2O3	0.275	0.319	0.182	0.176	0.18	0.278	1.975	0.976	1.415	1.945	0.050 - 3.189
	Al2O3	0.074	0.118	0.026	0.518	0.003	0.07	0.021	< d.l	0.086	0.095
	BaO	0.314	0.29	0.239	0.312	0.36	< d.l	< d.l	< d.l	0.221	0.307
	ZnO	< d.l	0.084	< d.l	< d.l	< d.l	< d.l	0.076	< d.l	< d.l	< d.l
	CuO	< d.l	< d.l	< d.l	< d.l	< d.l	< d.l	< d.l	< d.l	< d.l	< d.l
	NiO	< d.l	< d.l	< d.l	< d.l	< d.l	< d.l	0.052	< d.l	< d.l	< d.l
	CoO	0	0.011	0.005	0	0	0	0	0.002	0.009	0
	Total	99.7001	99.7396	99.6262	98.8514	98.3912	100.167	99.8184	100.246	100.313	100.342
	W	0.004	0.0055	0	0.005	0.0046	0.0145	0.0016	0.0071	0.0155	0.0072
	Ta	0.004	0.0067	0.0026	0	0	0.0007	0.0003	0.0005	0.0001	0
	Nb	0.0084	0.013	0.0067	0.0008	0.0012	0.0021	0.0011	0.0033	0.0007	0
	Sn	0.0108	0.0095	0.0048	0.0095	0.0078	0.0112	0.0095	0.0039	0.0086	0.0101
	Zr	0	0.0005	0	0.0002	0	0.0002	0.0006	0.0001	0.0001	0.0004
	Ti	0.95	0.936	0.9736	0.9484	0.9618	0.9384	0.9657	0.9659	0.9403	0.9572
	Fe	0.0176	0.02	0.0095	0.018	0.0039	0.0229	0.0019	0.007	0.0167	0.0028
	Cr	0.0001	0.0001	0	0.0051	0.0102	0	0.0009	0.0013	0.0002	0.0007
	V	0.003	0.0035	0.002	0.0019	0.002	0.0031	0.0214	0.0106	0.0156	0.0212
	Al	0.0012	0.0019	0.0004	0.0083	0	0.0011	0.0003	0	0.0014	0.0015
	Ba	0.0017	0.0016	0.0013	0.0017	0.0019	0.0001	0.0001	0	0.0012	0.0016
	Zn	0.0002	0.0009	0.0001	0.0001	0	0	0.0008	0.0002	0	0.0004
	Cu	0	0	0	0	0	0	0.0003	0	0	0
	Ni	0	0.0001	0	0.0001	0	0	0.0006	0	0.0002	0
	Co	0	0.0001	0.0001	0	0	0	0	0	0.0001	0
	Total	1.001	0.9994	1.0011	0.9991	0.9934	0.9943	1.0051	0.9999	1.0007	1.0031

## Sheet: Table S7
	Table S7: Representative analyses, ion distributions per formula unit and range of concentrations (in wt%) of essential elements in cassiterite
		Cst I				Cst II				Cst gr
		cst10_b2/4	cst12_b1/1	cst13_b16/6	Range	p3b_ox1/4	p5c_ox/5	w25_b4/5	Range	gr1b_b2/1	gr1b_b2/4	gr2a_b5/1	gr3c_b1/1
	WO3	<d.l.	<d.l.	<d.l.	up to 1.146	<d.l.	0.253	<d.l.	up to 0.608	<d.l.	< d.l	<d.l.	0.153
	Ta2O5	< d.l	<d.l.	< d.l	up to 0.390	<d.l.	<d.l.	<d.l.	up to 0.446	<d.l.	<d.l.	0.228	<d.l.
	Nb2O5	<d.l.	<d.l.	<d.l.	up to 0.223	<d.l.	0.033	<d.l.	up to 0.192	<d.l.	0.037	<d.l.	0.075
	SnO2	99.134	99.326	99.056	97.224 - 99.96	98.73	99.279	99.396	96.092 - 99.93	98.36	98.982	98.694	99.119
	TiO2	0.454	0.382	0.298	up to 1.512	<d.l.	0.027	0.516	up to 1.052	0.709	0.333	0.572	0.402
	Fe2O3	0.04	0.0311	0.01	up to 1.713	0.5468	0.1311	0.0411	up to 2.506	0.0589	0.0267	0.0511	0.0011
	Mn2O3	<d.l.	< d.l	0.0579	up to 0.109	<d.l.	<d.l.	<d.l.	up to 0.112	< d.l	<d.l.	<d.l.	0.0467
	Cr2O3	0.044	<d.l.	<d.l.	up to 0.069	<d.l.	<d.l.	<d.l.	up to 0.072	< d.l	<d.l.	<d.l.	<d.l.
	V2O3	0.046	<d.l.	<d.l.	up to 0.270	<d.l.	<d.l.	<d.l.	up to 0.186	< d.l	< d.l	< d.l	< d.l
	ZnO	<d.l.	< d.l	0.073	up to 1.274	<d.l.	<d.l.	<d.l.	up to 0.596	0.237	<d.l.	0.169	< d.l
	CuO	<d.l.	< d.l	< d.l	up to 0.930	0.046	< d.l	< d.l	up to 0.697	< d.l	<d.l.	<d.l.	<d.l.
	NiO	<d.l.	<d.l.	<d.l.	up to 0.112	<d.l.	< d.l	<d.l.	up to 0.252	< d.l	0.022	< d.l	< d.l
	CoO	<d.l.	< d.l	< d.l	up to 0.142	<d.l.	0.061	0.049	up to 0.101	<d.l.	0.05	<d.l.	<d.l.
	Total	99.718	99.7391	99.4949		99.3228	99.7841	100.002		99.3649	99.4507	99.7141	99.7968
	W	0	0	0		0	0.0016	0		0	0.0001	0	0.001
	Ta	0.0001	0	0.0001		0	0	0		0	0	0.0015	0
	Nb	0	0	0		0	0.0004	0		0	0.0004	0	0.0008
	Sn	0.988	0.9895	0.9905		0.99	0.992	0.9861		0.9815	0.989	0.9823	0.9883
	Ti	0.0085	0.0072	0.0056		0	0.0005	0.0097		0.0133	0.0063	0.0107	0.0076
	Fe	0.0008	0.0006	0.0002		0.0103	0.0025	0.0008		0.0011	0.0005	0.001	0
	Mn	0	0.0003	0.0011		0	0	0		0.0004	0	0	0.0009
	Cr	0.0009	0	0		0	0	0.0004		0.0001	0	0	0
	V	0.0009	0.0003	0		0	0	0		0.0002	0.0003	0	0
	Zn	0	0.0003	0.0014		0	0	0		0.0044	0	0.0031	0.0003
	Cu	0	0.0001	0.0001		0.0009	0	0.0003		0.0007	0	0	0
	Ni	0.0002	0	0		0	0	0		0.0003	0.0004	0.0003	0.0001
	Co	0	0.0002	0		0	0.0012	0.001		0	0.001	0	0
	Total	0.9994	0.9985	0.999		1.0012	0.9982	0.9983		1.002	0.998	0.9989	0.999

## Sheet: Table S8
	Table S8: Representative analyses, ion distributions per formula unit and range of concentrations (in wt%) of essential elements in wolframite
		Wolf I						Wolf II
		core	core	core			Range	core	core	core			Range
		PAN3b/4	PO17_6/2	p4a_w/1	w11_b4/1	w13_b11/3		w10_b7/6	p4b_w/6	tpz18_b2/5	w14_b1/1	w15_b11/2
	WO3	74.643	75.171	75.01	75.085	75.521	73.375 - 77.217	75.364	75.344	76.057	74.632	75.804	73.838 - 77.076
	Ta2O5	< d.l	0.214	< d.l	< d.l	0.207	up to 0.510	0.17	0.348	< d.l	0.157	< d.l	up to 0.498
	Nb2O5	< d.l	0.056	0.273	0.108	0.108	up to 1.196	0.123	0.348	0.235	0.289	0.57	up to 0.649
	ZrO2	< d.l	0.334	< d.l	0.435	< d.l	up to 0.554	0.353	< d.l	0.333	0.061	< d.l	up to 0.522
	TiO2	< d.l	< d.l	< d.l	< d.l	< d.l	up to 0.120	< d.l	< d.l	< d.l	< d.l	< d.l	up to 0.14
	Bi2O3	< d.l	< d.l	0.119	< d.l	< d.l	up to 0.243	< d.l	< d.l	< d.l	0.151	0.091	up to 0.239
	Fe2O3 *	3.0068	1.2917	2.505	1.4955	1.0152	0.035 - 4.630	1.1063	0.9028	0.9789	2.5014	0.6818	up to 4.1524
	Cr2O3	0.165	< d.l	< d.l	< d.l	< d.l	up to 0.209	< d.l	< d.l	0.044	< d.l	< d.l	up to 0.065
	V2O3	0.017	0.031	< d.l	< d.l	< d.l	up to 0.064	< d.l	< d.l	< d.l	< d.l	< d.l	up to 0.061
	ZnO	< d.l	0.123	< d.l	0.108	0.072	up to 0.297	< d.l	< d.l	< d.l	0.104	< d.l	up to 0.249
	NiO	< d.l	0.056	< d.l	< d.l	< d.l	up to 0.095	< d.l	< d.l	< d.l	< d.l	< d.l	up to 0.097
	CoO	< d.l	0.03	< d.l	< d.l	< d.l	up to 0.141	0.041	0.048	< d.l	0.026	0.046	up to 0.137
	FeO	18.1615	17.0367	18.0729	18.6653	19.3345	13.258 - 22.072	20.2725	19.8346	20.0652	18.7912	17.3435	11.804 - 21.955
	MnO	3.476	5.398	4.016	3.85	3.596	0.589 - 7.753	2.544	3.182	2.282	3.188	5.095	1.218 - 10.701
	Total	99.4693	99.7414	99.9959	99.7468	99.8537		99.9738	100.007	99.9951	99.9006	99.6313
	W	0.9681	0.9774	0.9691	0.9761	0.9842		0.9801	0.9778	0.98	0.9662	0.9779
	Ta	0	0.0029	0	0	0.0028		0.0023	0.0047	0	0.0021	0.0005
	Nb	0	0.0013	0.0062	0.0024	0.0025		0.0028	0.0079	0.0053	0.0065	0.0128
	Zr	0.0004	0.0082	0	0.0106	0		0.0086	0	0.0081	0.0015	0.0002
	Ti	0	0	0	0	0		0	0	0	0.0001	0
	Fe3+ *	0.0301	0.0074	0.0223	0.0083	0.0078		0.0049	0.0046	0.004	0.021	0.0033
	Total	0.9986	0.9972	0.9976	0.9974	0.9973		0.9987	0.995	0.9974	0.9974	0.9947
	Bi	0	0	0.0015	0.0005	0.0001		0.0004	0.0004	0	0.0019	0.0012
	Fe3+ *	0.0831	0.0414	0.0717	0.0481	0.0306		0.0368	0.0295	0.0326	0.073	0.0223
	Cr	0.0065	0	0	0.0001	0		0	0	0.0017	0	0.0004
	V	0.0007	0.0012	0	0	0		0	0.0006	0	0	0
	Zn	0	0.0046	0.0004	0.004	0.0027		0.0002	0	0	0.0038	0
	Ni	0.0005	0.0023	0.0005	0.0006	0		0.0009	0.0005	0	0	0
	Co	0	0.0012	0	0	0		0.0016	0.0019	0	0.001	0.0018
	Fe2+	0.7601	0.7148	0.7535	0.783	0.8131		0.8508	0.8306	0.8676	0.7851	0.722
	Mn	0.1473	0.2294	0.1696	0.1636	0.1532		0.1081	0.135	0.0961	0.1349	0.2485
	Total	0.9982	0.9949	0.9972	0.9999	0.9997		0.9988	0.9985	0.998	0.9997	0.9962
	* algebraic estimation

## Sheet: Table S9
	Table S8: Uraninite analyses in greisen samples
	wt%	Interstitial grains (interface of primary Qz and secondary Ms)			Inclusions in secondary coarse-grained Ms
	UO2	93.99	94.99	95.0292	96.612	96.928
	ThO2	1.89	1.89	0.5
	PbO	3.92	3.82	3.903	3.758	3.733
	Ma	302	292	299	284	281

## Sheet: Table S10
	Table S10: Representative analyses, ion distributions per formula unit and range of concentrations (in wt%) of essential elements in apatite
		Apt I							Apt II
		ap1_b2/1	cst12_b1/1	ms17_b4/2	ms7_b2/3	p7a_ap/1	tpz13_b1/6	Range	ap3_b4/1	ap5_b1/3	ap6_l1_3/4	fl1_b4_apa	Range
	P2O5	42.121	41.805	41.763	42.627	41.693	41.438	39.820 - 43.070	43.034	42.835	42.288	42.131	41.821 - 47.372
	Lu2O3	< d.l.	< d.l.	< d.l.	< d.l.	< d.l.	< d.l.		< d.l.	< d.l.	< d.l.	< d.l.
	Yb2O3	< d.l.	< d.l.	< d.l.	< d.l.	0.188	< d.l.		< d.l.	< d.l.	< d.l.	< d.l.
	Tm2O3	< d.l.	< d.l.	< d.l.	< d.l.	< d.l.	< d.l.		< d.l.	< d.l.	< d.l.	< d.l.
	Er2O3	< d.l.	< d.l.	< d.l.	< d.l.	0.166	< d.l.		< d.l.	< d.l.	< d.l.	< d.l.
	Ho2O3	< d.l.	< d.l.	< d.l.	< d.l.	< d.l.	< d.l.		< d.l.	< d.l.	< d.l.	< d.l.
	Dy2O3	< d.l.	< d.l.	< d.l.	< d.l.	< d.l.	< d.l.		< d.l.	< d.l.	< d.l.	< d.l.
	Tb2O3	< d.l.	< d.l.	< d.l.	< d.l.	0.245	< d.l.		< d.l.	< d.l.	< d.l.	< d.l.
	Gd2O3	< d.l.	< d.l.	< d.l.	< d.l.	< d.l.	< d.l.		< d.l.	< d.l.	< d.l.	< d.l.
	Eu2O3	< d.l.	< d.l.	< d.l.	< d.l.	0.207	< d.l.		< d.l.	< d.l.	< d.l.	< d.l.
	Sm2O3	< d.l.	< d.l.	< d.l.	< d.l.	< d.l.	< d.l.		< d.l.	< d.l.	< d.l.	< d.l.
	Nd2O3	< d.l.	< d.l.	< d.l.	< d.l.	0.128	< d.l.		< d.l.	< d.l.	< d.l.	< d.l.
	Pr2O3	< d.l.	< d.l.	< d.l.	< d.l.	< d.l.	< d.l.		< d.l.	< d.l.	< d.l.	< d.l.
	Ce2O3	0.199	< d.l.	< d.l.	0.228	< d.l.	< d.l.		< d.l.	< d.l.	< d.l.	0.139
	La2O3	< d.l.	< d.l.	< d.l.	< d.l.	< d.l.	< d.l.		< d.l.	< d.l.	< d.l.	< d.l.
	Y2O3	< d.l.	< d.l.	< d.l.	< d.l.	< d.l.	< d.l.	up to 0.120	< d.l.	< d.l.	< d.l.	< d.l.
	Fe2O3 *	0.2822	0.1734	0.432	0.144	< d.l.	0.9246	up to 2.831	< d.l.	< d.l.	< d.l.	< d.l.	up to 0.431
	Mn2O3 *	< d.l.	0.049	< d.l.	< d.l.	< d.l.	0.5775	up to 1.772	< d.l.	< d.l.	< d.l.	< d.l.	up to 0.499
	BaO	< d.l.	< d.l.	< d.l.	< d.l.	< d.l.	< d.l.	up to 0.520	< d.l.	< d.l.	< d.l.	< d.l.
	SrO	0.183	< d.l.	0.075	0.192	0.223	< d.l.	up to 5.261	0.525	0.242	0.108	< d.l.	up to 5.150
	FeO	0.2551	< d.l.	0.5672	0.0964	0.756	< d.l.	up to 2.773	0.296	0.048	0.372	0.121	up to 1.630
	MnO	2.036	< d.l.	1.783	1.866	2.35	< d.l.	up to 4.412	1.187	0.716	1.578	0.316	up to 5.550
	CaO	53.306	55.237	52.984	54.416	52.094	54.185	47.591 - 56.422	54.309	54.906	52.622	54.426	49.700 - 56.461
	MgO	0.005	0.057	0.021	0.01	0.041	0.109	up to 0.850	0.027	< d.l.	0.013	0.021	up to 0.040
	Na2O	0.061	0.182	0.016	< d.l.	0.084	0.194	up to 0.570	< d.l.	0.02	0.033	0.136	up to 0.170
	Cl	< d.l.	< d.l.	0.05	< d.l.	0.024	0.152	up to 0.821	< d.l.	< d.l.	< d.l.	< d.l.	up to 0.600
	F	3.771	3.487	3.055	3.666	3.439	3.345	2.291 - 3.810	3.355	3.322	3.268	3.738	2.210 - 3.880
	H2O *	0	0.1238	0.311	0.0666	0.1358	0.1491		0.2169	0.2271	0.2219	0.004
	Total	102.219	100.99	100.746	103.245	101.638	100.925		102.733	102.089	100.282	101.028
	O=F	-1.5879	-1.4683	-1.2864	-1.5437	-1.4481	-1.4085		-1.4127	-1.3988	-1.3761	-1.574
	O=Cl	-0.0014	0	-0.0113	-0.0014	-0.0054	-0.0343		-0.0016	-0.0007	0	0
	Total	100.63	99.5221	99.4485	101.7	100.184	99.4823		101.319	100.689	98.9059	99.454
	REE2O3	0.199	0	0	0.228	0.934	0	up to 2.93	0	0	0	0.139	up to 0.460
	P	2.9927	2.9856	2.991	2.9952	2.9855	2.9652		3.0186	3.0154	3.03	3.0103
	Lu	0	0	0	0	0	0		0	0	0	0
	Yb	0	0	0	0	0.0048	0		0	0	0	0
	Tm	0	0	0	0	0	0		0	0	0	0
	Er	0	0	0	0	0.0044	0		0	0	0	0
	Ho	0	0	0	0	0	0		0	0	0	0
	Dy	0	0	0	0	0	0		0	0	0	0
	Tb	0	0	0	0	0.0068	0		0	0	0	0
	Gd	0	0	0	0	0	0		0	0	0	0
	Eu	0	0	0	0	0.006	0		0	0	0	0
	Sm	0	0	0	0	0	0		0	0	0	0
	Nd	0	0	0.0021	0	0.0039	0.0002		0	0.0001	0.0004	0
	Pr	0	0	0	0	0	0		0	0	0	0
	Ce	0.0061	0	0	0.0069	0	0		0	0	0	0.0043
	La	0	0	0	0	0	0		0	0	0	0
	Y	0	0	0	0	0	0		0	0	0	0
	Fe3+ *	0.0141	0.011	0.0275	0.009	0	0.0588		0	0	0	0
	Mn3+ *	0	0.0031	0	0	0	0.0372		0	0	0	0
	Ba	0	0	0	0	0	0		0	0	0	0
	Sr	0.0089	0	0.0037	0.0092	0.0109	0		0.0252	0.0117	0.0053	0
	Fe2+	0.0179	0	0.0401	0.0067	0.0535	0		0.0205	0.0033	0.0263	0.0085
	Mn2+	0.1447	0	0.1278	0.1312	0.1684	0		0.0833	0.0504	0.1131	0.0226
	Ca	4.7933	4.9927	4.8025	4.8391	4.7212	4.9073		4.8213	4.8918	4.7719	4.9217
	Mg	0.0006	0.0072	0.0026	0.0012	0.0052	0.0137		0.0033	0	0.0016	0.0026
	Na	0.0099	0.0298	0.0026	0	0.0138	0.0318		0	0.0032	0.0054	0.0223
	Total	4.9955	5.0438	5.0089	5.0033	4.9989	5.049		4.9536	4.9605	4.924	4.982
	OH *	0	0.0697	0.1755	0.0369	0.0766	0.084		0.1199	0.126	0.1253	0.0023
	Cl	0	0	0.0072	0.0008	0.0034	0.0218		0.001	0.0004	0	0
	F	1.0009	0.9303	0.8173	0.9623	0.9199	0.8942		0.8791	0.8736	0.8747	0.9977
	Total	1.001	1	1	1	1	1		1	1	1	1
	* algebraic estimation
	B, Si, S, V and As are also below the EPMA detection limit for the large majority of analyses and were removed from the table to shorten it.
